# Supplementary material for: Assessing healthy longevity in low- and middle-income countries: An applied performance dashboard for India
Source: Research Square preprint supplement (doi:10.21203/rs.3.rs-8110936/v1), 2025-12-10
Supplement: Supplementary file 1 [file ab8720784386fe9396057779.docx]

**Supplementary webappendix: Assessing healthy longevity in low- and middle-income countries: An applied performance dashboard for India**

[**Calculation of performance score based on the percentile rank approach** 2](#_Toc161397057)

[**Calculation of performance score based on the Z-score approach** 2](#_Toc161397058)

[**Supplementary Tables** 3](#_Toc161397059)

[Table A1. List of 33 lower-middle income countries with population of more than 7 million in 2020 3](#_Toc161397060)

[Table A2. Indicator data sources for the HLI dashboard for India 3](#_Toc161397061)

[**References** 5](#_Toc161397062)

# **Calculation of performance score based on the percentile rank approach**

In the percentile rank approach, the score for an indicator is represented by its percentile rank, calculated using the standard formula:

, where M is the number of values below the value for the given country, R is the number of values equals to the value for the country, and Y is the total number of values.

For indicators where a higher value indicates better performance, such as life expectancy and employment rate, the percentile rank is directly interpreted as the score, whereas for indicators where a lower value indicates better performance, such as mortality and morbidity rate, the score is further calculated as 1 – percentile rank. We use ‘P’ to denote the score calculated based on this approach.

# **Calculation of performance score based on the Z-score approach**

While the percentile rank score represents the performance of a country relative to all other countries, it does not take into account the distribution of the indicator across countries. For this, we compute the z-score, assuming a normal distribution, using the standard formula:

, where x is the value for the given country, µ is the mean value across all comparator countries, and**σ** is the standard deviation.

Based on the z-score, we then use the z-table to obtain the percentage of countries with scores lower than that of the study country. This percentage is used as the score for indicators where the higher the value, the better the performance, such as life expectancy. For indicators where the lower the value, the better the performance, the score is further calculated as 1 – calculated percentage. The score calculated using this approach is denoted by ‘Z’.

**Supplementary Tables**

Table A1. List of 33 lower-middle income countries with population of more than 7 million in 2020.(1,2)

| Algeria | Ghana | Myanmar | Tunisia |
| --- | --- | --- | --- |
| Angola | Haiti | Nepal | Ukraine |
| Bangladesh | Honduras | Nigeria | Tanzania |
| Benin | India | Pakistan | Uzbekistan |
| Bolivia | Indonesia | Papua New Guinea | Vietnam |
| Cambodia | Iran | Philippines | Zimbabwe |
| Cameroon | Kenya | Senegal |  |
| Côte d'Ivoire | Lao People's Democratic Republic | Sri Lanka |  |
| Egypt | Morocco | Tajikistan |  |

Table A2. Indicator data sources for the HLI dashboard for India.

| Indicators | Data sources |
| --- | --- |
| GDP per capita  GINI index  Poverty gap at $3.65 a day (2017 PPP), as % of the poverty line | World Bank, 2022.(3) |
| Percentage of population aged 60 years and older  Percentage of population of working age | United Nations Department of Economic and Social Affairs Population Division.(2) |
| Labour force participation rate  Ratio of female to male labour force participation rate | World Bank, 2022.(3) |
| Mean years of schooling | Global Data Lab, 2013-2023;(4) Smits and Permanyer, 2019.(5) |
| Percentage of total deaths due to NCDs | WHO Global Health Estimates, 2020. (6) |
| UHC service coverage index | World Health Organization, 2022.(7) |
| Life expectancy at birth  Life expectancy at age 60  Healthy life expectancy at birth  Healthy life expectancy at age 60 | WHO Global Health Observatory, 2022.(8) |
| Under-five mortality rate (per 1,000 live births)  School age (age 5-14 years) mortality rate (per 100,000 population)  Mortality rate among youths and young adults (age 15-29 years) (per 100,000 population)  Adult (aged 30-69 years) mortality rate (per 100,000 population)  Mortality rate at older ages (aged 70 years and above) (per 100,000 population) | WHO Global Health Estimates, 2020. (6) |
| Percentage of one-year olds who received three doses of diphtheria tetanus toxoid and pertussis (DTP3) immunization  Percentage of one-year olds who received three doses of polio (Pol3) immunization  Percentage of one-year olds who received two doses of measles (MCV2) immunization | WHO Global Health Observatory, 2020.(8) |
| Stunting prevalence among children under 5 years  Wasting prevalence among children under 5 years  Underweight prevalence among children under 5 years | WHO Global Health Observatory, 2022.(8) |
| Percentage of mothers whose last birth was protected against neonatal tetanus | WHO Global Health Observatory, 2022.(8) |
| Percentage of population that received at least two doses of COVID-19 vaccination | Mathieu, Ritchie, Ortiz-Ospina et al., 2021.(9) |
| Prevalence of treatment (taking medicine) for hypertension among population aged 30-79 with hypertension | WHO Global Health Observatory, 2022.(8) |
| Percentage of population aged 15+ years who currently use tobacco  Youth tobacco use (percentage of population aged 15-24 years who use tobacco)  Ratio of former to current smokers aged 45-59 years | Global Burden of Disease Study, 2019.(10) * |
| Percentage of population aged 15+ years who smoke cigarettes  Percentage of population aged 15+ years who practise harmful use of alcohol in the past 12 months  Percentage of population aged 20+ years who have overweight or obesity | WHO Global Health Observatory, 2019.(8) |
| Percentage of population aged 20-79 years who have type 2 diabetes | International Diabetes Federation, 2021.(11) |
| Percentage of population aged 30-79 years who have hypertension | WHO Global Health Observatory, 2019.(8) |
| Percentage of population aged 18 years and older who currently have depressive disorders | National Mental Health Survey of India, 2016.(12) |
| Percentage of population aged 30-79 years with hypertension that are currently taking antihypertensive medication | WHO Global Health Observatory, 2019.(8) |
| Learning-adjusted years of schooling at age 18 | World Bank, 2021.(13) |
| Prevalence of intimate partner violence among ever-partnered women in the past 12 months | WHO Global Health Observatory, 2019.(8) |
| Percentage of women’s work time (paid and unpaid) spent on unpaid work | ILO, 2018.(14) |
| Ratio of female to male labour force participation rate | World Bank, 2022.(3) |
| Social Institution and Gender Index (SIGI) | OECD, 2019.(15) |
| Labour force participation rate among population aged 15 years and over | World Bank, 2022.(3) |
| Population covered by at least one social protection cash benefit (excluding health) † | ILO, 2020.(16) |

* We included estimates of tobacco use from the GBD because they were generated from nationally representative surveys on tobacco use.

†Proportion of the total population receiving at least one contributory or non‑contributory cash benefit, or actively contributing to at least one social security scheme.

# **References**

1. World Bank. World Bank Country and Lending Groups [Internet]. 2021 [cited 2022 Sep 28]. Available from: <https://datahelpdesk.worldbank.org/knowledgebase/articles/906519-world-bank-country-and-lending-groups>
2. United Nations, Department of Economic and Social Affairs, Population Division. World Population Prospects 2022 [Internet]. 2022 [cited 2022 Sep 28]. Available from: <https://population.un.org/dataportal/home>
3. World Bank. World Development Indicators. Washington, D. C.: World Bank. 2022 [cited 2022 Sep 28]. Available from: <https://data.worldbank.org/indicator>
4. Global Data Lab. Subnational HDI. The Netherlands: Global Data Lab, Institute for Management Research, Radboud University; 2013-2023 [cited 2023 Apr 4]. Available from: https://globaldatalab.org/shdi/download/
5. Smits J, Permanyer I. The Subnational Human Development Database. Sci Data. 2019;6(1):190038.
6. World Health Organization. Global Health Estimates 2020: Deaths by Cause, Age, Sex, by Country and by Region, 2000-2019. Geneva, World Health Organizaton; 2020. [Internet]. 2020 [cited 2022 Oct 13]. Available from: <https://www.who.int/data/gho/data/themes/mortality-and-global-health-estimates/global-health-estimates-leading-causes-of-dalys>
7. World Health Organization. UHC service coverage index (3.8.1) [Internet]. 2022 [cited 2022 Oct 13]. Available from: <https://www.who.int/data/gho/indicator-metadata-registry/imr-details/4834>
8. World Health Organization. Global Health Observatory- World Health Organization (WHO) [Internet]. Geneva: World Health Organization (WHO). 2022 [cited 2022 Sep 28]. Available from: <https://www.who.int/data/gho/data/indicators/indicators-index>
9. Mathieu E, Ritchie H, Ortiz-Ospina E, Roser M, Hasell J, Appel C, et al. A global database of COVID-19 vaccinations. Nat Hum Behav. 2021 Jul;5(7):947–53.
10. Institute for Health Metrics and Evaluation (IHME). The Global Burden of Disease Study 2019 (GBD 2019) Results [Internet]. Seattle, Washington: IHME, University of Washington, 2022. 2022 [cited 2022 Oct 13]. Available from: <https://vizhub.healthdata.org/gbd-results/>
11. International Diabetes Federation. Diabetes estimates (20-79 y): Age-adjusted comparative prevalence of diabetes, % [Internet]. 2022 [cited 2022 Oct 13]. Available from: <https://diabetesatlas.org/data/en/indicators/2/>
12. Gururaj G, Varghese M, Benegal V, Rao GN, Pathak K, Singh LK, et al. National Mental Health Survey of India, 2015-16: Prevalence, patterns and outcomes. Bengaluru, National Institute of Mental Health and Neuro Sciences, NIMHANS Publication No. 129; 2016.
13. World Bank. The Human Capital Index 2020 Update: Human Capital in the Time of COVID-19. Washington, DC: World Bank; 2021.
14. International Labour Organization (ILO). Care work and care jobs for the future of decent work. Geneva: ILO; 2018.
15. Organization for Economic Co-operation and Development (OECD). SIGI 2019 Global Report: Transforming Challenges into Opportunities, Social Institutions and Gender Index. [Internet]. Paris: OECD Publishing.; 2019. Available from: <https://doi.org/10.1787/bc56d212-en>.
16. International Labour Organization (ILO). World Social Protection Data Dashboards [Internet]. 2020 [cited 2022 Oct 13]. Available from: <https://www.social-protection.org/gimi/WSPDB.action?id=19>
